# Supplementary material
Source: PubMed Central journal article supplement (PMC3016659)
Supplement: 10.3163.1536-5050.99.1.004.sg001.pdf [file 10.3163.1536-5050.99.1.004.sg001.pdf]

## The lost history of American veterinary medicine: the need for preservation

C. Trenton Boyd, MA, AHIP

**Table 1**

Library holdings of publications of US veterinary schools that are no longer in operation as of 2010

|     | Name and location of veterinary school                       | Year established | Year closed | No. of title-level records found | No. of holdings records in: |      |      |     |
|-----|--------------------------------------------------------------|------------------|-------------|----------------------------------|-----------------------------|------|------|-----|
|     |                                                              |                  |             |                                  | Other libraries             | NAL* | NLM* | LC* |
| 1.  | Veterinary College of Philadelphia                           | 1852             | 1859        | 4                                | 5                           | 0    | 0    | 0   |
| 2.  | Boston (MA) Veterinary Institute                             | 1854             | 1860        | 1                                | 4                           | 0    | 1    | 0   |
| 3.  | New York College of Veterinary Surgeons (NYC)                | 1857             | 1899        | 8                                | 14                          | 1    | 1    | 0   |
| 4.  | Veterinary Institute of Chicago (IL)                         | 1864             | ca1869      | none                             | 0                           | 0    | 0    | 0   |
| 5.  | Pennsylvania College of Veterinary Surgeons (Philadelphia)   | 1866             | 1870        | 1                                | 1                           | 0    | 0    | 0   |
| 6.  | St. Louis (MO) Veterinary College                            | ca1875           | ca1875      | none                             | 0                           | 0    | 0    | 0   |
| 7.  | American Veterinary College (New York, NY)                   | 1875             | 1899        | 6                                | 3                           | 2    | 1    | 1   |
| 8.  | Columbia Veterinary College (New York, NY)                   | 1877             | 1884        | 2                                | 2                           | 0    | 0    | 0   |
| 9.  | Minnesota College Hospital Veterinary College (Minneapolis)  | 1881             | 1890        | none                             | 0                           | 0    | 0    | 0   |
| 10. | Harvard University Veterinary Department (Boston, MA)        | 1882             | 1902        | 4                                | 4                           | 0    | 0    | 3   |
| 11. | Chicago (IL) Veterinary College                              | 1883             | 1920        | 5                                | 9                           | 2    | 1    | 0   |
| 12. | New Jersey Veterinary College (Trenton)                      | ca1887           | ca1887      | none                             | 0                           | 0    | 0    | 0   |
| 13. | University of South Carolina Division of Veterinary Medicine | 1888             | 1891        | none                             | 0                           | 0    | 0    | 0   |
| 14. | Baltimore (MD) University School of Veterinary Medicine      | 1889             | 1891        | none                             | 0                           | 0    | 0    | 0   |
| 15. | Detroit (MI) College of Veterinary Medicine Department       | 1890             | 1899        | none                             | 0                           | 0    | 0    | 0   |
| 16. | Iowa Veterinary College (Des Moines)                         | 1890             | 1894        | none                             | 0                           | 0    | 0    | 0   |
| 17. | Kansas City (MO) Veterinary College                          | 1891             | 1918        | 5                                | 6                           | 1    | 0    | 1   |

|     | Name and location of<br>veterinary school                                             | Year<br>estab-<br>lished | Year<br>closed | No. of<br>title-<br>level<br>records<br>found | No. of holdings records in: |      |      |     |
|-----|---------------------------------------------------------------------------------------|--------------------------|----------------|-----------------------------------------------|-----------------------------|------|------|-----|
|     |                                                                                       |                          |                |                                               | Other<br>libraries          | NAL* | NLM* | LC* |
| 18. | Kentucky State College<br>Veterinary Department<br>(Lexington)                        | 1891                     | 1895           | none                                          | 0                           | 0    | 0    | 0   |
| 19. | Ohio Veterinary College<br>(Cincinnati)                                               | 1891                     | 1896           | 1                                             | 2                           | 0    | 0    | 0   |
| 20. | Indiana Veterinary College<br>(Indianapolis)                                          | 1892                     | 1924           | 6                                             | 7                           | 3    | 0    | 0   |
| 21. | McKillip Veterinary College<br>(Chicago, IL)                                          | 1894                     | 1920           | 5                                             | 8                           | 1    | 0    | 0   |
| 22. | National Veterinary College<br>(Washington, DC)                                       | 1892                     | 1896           | 3                                             | 0                           | 0    | 3    | 0   |
| 23. | United States College of<br>Veterinary Department<br>(Washington, DC)                 | 1894                     | 1927           | 3                                             | 1                           | 1    | 1    | 1   |
| 24. | University of California, San<br>Francisco, Veterinary<br>College                     | 1895                     | 1899           | none                                          | 0                           | 0    | 0    | 0   |
| 25. | Columbian University<br>Veterinary Department<br>(Washington, DC)                     | 1896                     | 1898           | 1                                             | 1                           | 0    | 1    | 0   |
| 26. | Grand Rapids (MI) Medical<br>College Veterinary<br>Department                         | 1897                     | 1918           | 9                                             | 9                           | 2    | 0    | 1   |
| 27. | Western Veterinary College<br>(Kansas City, MO)                                       | 1897                     | 1908           | none                                          | 0                           | 0    | 0    | 0   |
| 28. | New York University, New<br>York, American Veterinary<br>College (NYC)                | 1899                     | 1913           | 2                                             | 2                           | 0    | 0    | 0   |
| 29. | San Francisco (CA)<br>Veterinary College                                              | 1899                     | 1918           | 3                                             | 2                           | 1    | 0    | 0   |
| 30. | Collins Veterinary College<br>(Nashville, TN)                                         | ca1899                   | ca1899         | none                                          | 0                           | 0    | 0    | 0   |
| 31. | Cincinnati (OH) Veterinary<br>College                                                 | 1900                     | 1920           | none                                          | 0                           | 0    | 0    | 0   |
| 32. | University Veterinary<br>College (Kansas City, MO)                                    | 1902                     | 1906           | none                                          | 0                           | 0    | 0    | 0   |
| 33. | St. Joseph (MO) Veterinary<br>College                                                 | 1905                     | 1923           | 2                                             | 0                           | 0    | 0    | 2   |
| 34. | West Virginia University<br>Veterinary Department<br>(Morgantown)                     | 1905                     | 1912           | none                                          | 0                           | 0    | 0    | 0   |
| 35. | George Washington<br>University College of<br>Veterinary Medicine<br>(Washington, DC) | 1908                     | 1918           | 1                                             | 0                           | 0    | 0    | 1   |
| 36. | Terre Haute (IN) Veterinary<br>College                                                | 1909                     | 1918           | none                                          | 0                           | 0    | 0    | 0   |

|        | Name and location of<br>veterinary school                                                            | Year<br>estab-<br>lished | Year<br>closed | No. of<br>title-<br>level<br>records<br>found | No. of holdings records in: |      |      |     |
|--------|------------------------------------------------------------------------------------------------------|--------------------------|----------------|-----------------------------------------------|-----------------------------|------|------|-----|
|        |                                                                                                      |                          |                |                                               | Other<br>libraries          | NAL* | NLM* | LC* |
| 37.    | Southwestern Veterinary<br>College (Dallas, TX)                                                      | 1909                     | 1916           | 1                                             | 1                           | 0    | 0    | 0   |
| 38.    | Arkansas Veterinary<br>College (Fayetteville)                                                        | 1913                     | 1921           | none                                          | 0                           | 0    | 0    | 0   |
| 39.    | New York University, New<br>York, State Veterinary<br>College (NYC)                                  | 1913                     | 1922           | 4                                             | 1                           | 2    | 0    | 1   |
| 40.    | University of Georgia State<br>College of Agriculture<br>Division of Veterinary<br>Medicine (Athens) | 1918                     | 1933           | none                                          | 0                           | 0    | 0    | 0   |
| 41.    | Middlesex University<br>School of Veterinary<br>Medicine (Waltham, MA)                               | 1938                     | 1947           | 3                                             | 6                           | 2    | 1    | 1   |
| Totals |                                                                                                      |                          |                | 80                                            | 88                          | 18   | 10   | 1   |

\* NAL=National Agricultural Library; NLM=National Library of Medicine; LC=Library of Congress.
