# Supplementary material
Source: PubMed Central journal article supplement (PMC3016659)
Supplement: 10.3163.1536-5050.99.1.004.sg002.pdf [file 10.3163.1536-5050.99.1.004.sg002.pdf]

**The lost history of American veterinary medicine: the need for preservation**

**C. Trenton Boyd, MA, AHIP**

**Table 2**

Library holdings of publications of US veterinary schools that are no longer in operation as of 2010 held by only one library

|     | Name and location of veterinary school                        | No. of title-level records held by only one library | Held by:           |      |      |     | Other type of library |
|-----|---------------------------------------------------------------|-----------------------------------------------------|--------------------|------|------|-----|-----------------------|
|     |                                                               |                                                     | Veterinary library | NAL* | NLM* | LC* |                       |
| 1.  | Veterinary College of Philadelphia                            | 3                                                   | 0                  | 0    | 0    | 0   | 3                     |
| 2.  | Boston (MA) Veterinary Institute                              | none                                                | 0                  | 0    | 0    |     | 0                     |
| 3.  | New York College of Veterinary Surgeons (NYC)                 | 1                                                   | 0                  | 0    | 0    | 0   | 1                     |
| 4.  | Veterinary Institute of Chicago (IL)                          | none                                                | 0                  | 0    | 0    | 0   | 0                     |
| 5.  | Pennsylvania College of Veterinary Surgeons (Philadelphia)    | 1                                                   | 1                  | 0    | 0    | 0   | 0                     |
| 6.  | St. Louis (MO) Veterinary College                             | none                                                | 0                  | 0    | 0    | 0   | 0                     |
| 7.  | American Veterinary College (New York, NY)                    | 1                                                   | 0                  | 0    | 0    | 0   | 1                     |
| 8.  | Columbia Veterinary College (New York, NY)                    | none                                                | 0                  | 0    | 0    | 0   | 0                     |
| 9.  | Minnesota College Hospital Veterinary College (Minneapolis)   | none                                                | 0                  | 0    | 0    | 0   | 0                     |
| 10. | Harvard University Veterinary Department (Boston, MA)         | 1                                                   | 0                  | 0    | 0    | 0   | 1                     |
| 11. | Chicago (IL) Veterinary College                               | 3                                                   | 0                  | 1    | 0    | 0   | 2                     |
| 12. | New Jersey Veterinary College (Trenton)                       | none                                                | 0                  | 0    | 0    | 0   | 0                     |
| 13. | University of South Carolina, Division of Veterinary Medicine | none                                                | 0                  | 0    | 0    | 0   | 0                     |
| 14. | Baltimore (MD) University School of Veterinary Medicine       | none                                                | 0                  | 0    | 0    | 0   | 0                     |
| 15. | Detroit (MI) College of Veterinary Medicine Department        | none                                                | 0                  | 0    | 0    | 0   | 0                     |
| 16. | Iowa Veterinary College (Des Moines)                          | none                                                | 0                  | 0    | 0    | 0   | 0                     |
| 17. | Kansas City (MO) Veterinary College                           | 3                                                   | 1                  | 0    | 0    | 1   | 1                     |
| 18. | Kentucky State College Veterinary Department (Lexington)      | none                                                | 0                  | 0    | 0    | 0   | 0                     |
| 19. | Ohio Veterinary College                                       | none                                                | 0                  | 0    | 0    | 0   | 0                     |

|     | Name and location of<br>veterinary school                                          | No. of<br>title-level<br>records<br>held by<br>only <i>one</i><br>library | Held by:              |      |      |     | Other type<br>of library |
|-----|------------------------------------------------------------------------------------|---------------------------------------------------------------------------|-----------------------|------|------|-----|--------------------------|
|     |                                                                                    |                                                                           | Veterinary<br>library | NAL* | NLM* | LC* |                          |
|     | (Cincinnati)                                                                       |                                                                           |                       |      |      |     |                          |
| 20. | Indiana Veterinary College<br>(Indianapolis)                                       | 1                                                                         | 1                     | 0    | 0    | 0   | 0                        |
| 21. | McKillop Veterinary College<br>(Chicago, IL)                                       | 1                                                                         | 1                     | 0    | 0    | 0   | 0                        |
| 22. | National Veterinary College<br>(Washington, DC)                                    | none                                                                      | 0                     | 0    | 0    | 0   | 0                        |
| 23. | United States College of<br>Veterinary Department<br>(Washington, DC)              | 1                                                                         | 0                     | 0    | 0    | 1   | 0                        |
| 24. | University of California, San<br>Francisco, Veterinary College                     | none                                                                      | 0                     | 0    | 0    | 0   | 0                        |
| 25. | Columbian University Veterinary<br>Department (Washington, DC)                     | 1                                                                         | 0                     | 1    | 0    | 0   | 0                        |
| 26. | Grand Rapids (MI) Medical<br>College Veterinary Department                         | 2                                                                         | 1                     | 0    | 0    | 0   | 1                        |
| 27. | Western Veterinary College<br>(Kansas City, MO)                                    | none                                                                      | 0                     | 0    | 0    | 0   | 0                        |
| 28. | New York University, New York,<br>American Veterinary College<br>(NYC)             | 2                                                                         | 0                     | 0    | 0    | 0   | 2                        |
| 29. | San Francisco (CA) Veterinary<br>College                                           | 3                                                                         | 1                     | 1    | 0    | 0   | 1                        |
| 30. | Collins Veterinary College<br>(Nashville, TN)                                      | none                                                                      | 0                     | 0    | 0    | 0   | 0                        |
| 31. | Cincinnati (OH) Veterinary<br>College                                              | none                                                                      | 0                     | 0    | 0    | 0   | 0                        |
| 32. | University Veterinary College<br>(Kansas City, MO)                                 | none                                                                      | 0                     | 0    | 0    | 0   | 0                        |
| 33. | St. Joseph (MO) Veterinary<br>College                                              | 2                                                                         | 0                     | 0    | 0    | 0   | 2                        |
| 34. | West Virginia University<br>Veterinary Department<br>(Morgantown)                  | none                                                                      | 0                     | 0    | 0    | 0   | 0                        |
| 35. | George Washington University<br>College of Veterinary Medicine<br>(Washington, DC) | 1                                                                         | 0                     | 0    | 0    | 1   | 0                        |
| 36. | Terre Haute (IN) Veterinary<br>College                                             | none                                                                      | 0                     | 0    | 0    | 0   | 0                        |
| 37. | Southwestern Veterinary College<br>(Dallas, TX)                                    | 1                                                                         | 0                     | 0    | 0    | 0   | 1                        |
| 38. | Arkansas Veterinary College<br>(Fayetteville)                                      | none                                                                      | 0                     | 0    | 0    | 0   | 0                        |
| 39. | New York University, New York,<br>State Veterinary College (NYC)                   | 4                                                                         | 0                     | 2    | 0    | 1   | 1                        |

|        | Name and location of<br>veterinary school                                                         | No. of<br>title-level<br>records<br>held by<br>only <i>one</i><br>library | Held by:              |      |      |     | Other type<br>of library |
|--------|---------------------------------------------------------------------------------------------------|---------------------------------------------------------------------------|-----------------------|------|------|-----|--------------------------|
|        |                                                                                                   |                                                                           | Veterinary<br>library | NAL* | NLM* | LC* |                          |
| 40.    | University of Georgia State<br>College of Agriculture Division of<br>Veterinary Medicine (Athens) | none                                                                      | 0                     | 0    | 0    | 0   | 0                        |
| 41.    | Middlesex University School of<br>Veterinary Medicine (Waltham,<br>MA)                            | none                                                                      | 0                     | 0    | 0    | 0   | 0                        |
| Totals |                                                                                                   | 32                                                                        | 6                     | 5    | 0    | 4   | 17                       |

\* NAL=National Agricultural Library; NLM=National Library of Medicine; LC=Library of Congress.
