# Supplementary material
Source: PubMed Central journal article supplement (PMC3016659)
Supplement: 10.3163.1536-5050.99.1.004.sg003.pdf [file 10.3163.1536-5050.99.1.004.sg003.pdf]

**The lost history of American veterinary medicine: the need for preservation**

**C. Trenton Boyd, MA, AHIP**

**Table 3**  
US library holdings of veterinary supply catalogs

| <b>Name of company</b>                                   | <b>Date</b>           | <b>No. of records located</b> | <b>No. held by veterinary libraries</b> |
|----------------------------------------------------------|-----------------------|-------------------------------|-----------------------------------------|
| 1. American Thermo-Ware Co.                              | 1906                  | 1                             | 0                                       |
| 2. American Veterinary Supply Co.                        | 1915 (5th ed.)        | 2                             | 1                                       |
| 3. American Veterinary Supply Co.                        | 1920 (7th ed.)        | 3                             | 3                                       |
| 4. American Veterinary Supply Co.                        | 1922 (8th ed.)        | 1                             | 1                                       |
| 5. American Veterinary Supply Co.                        | 1936                  | 2                             | 2                                       |
| 6. Beebe Laboratories                                    | 1900s                 | 1                             | 1                                       |
| 7. Becton, Dickinson & Co.                               | 1920                  | 1                             | 0                                       |
| 8. Becton, Dickinson & Co.                               | 1921                  | 1                             | 0                                       |
| 9. Becton, Dickinson & Co.                               | 1935                  | 1                             | 0                                       |
| 10. Becton, Dickinson & Co. (different title from above) | 1935                  | 1                             | 0                                       |
| 11. Davis & Geck, Inc.                                   | 1991                  | 1                             | 1                                       |
| 12. Detroit Veterinary Instrument & Supply Co.           | 1900s                 | 1                             | 1                                       |
| 13. Detroit Veterinary Supply Co.                        | 1938                  | 1                             | 1                                       |
| 14. A. Eger                                              | 1900s                 | 2                             | 1                                       |
| 15. Fort Dodge Laboratories                              | 1956                  | 1                             | 1                                       |
| 16. O. M. Franklin Serum Co.                             | 1940                  | 1                             | 1                                       |
| 17. O. M. Franklin Serum Co.                             | 1942                  | 1                             | 1                                       |
| 18. O. M. Franklin Serum Co.                             | 1946                  | 1                             | 1                                       |
| 19. O. M. Franklin Serum Co.                             | 1947                  | 1                             | 1                                       |
| 20. O. M. Franklin Serum Co.                             | 1955                  | 1                             | 1                                       |
| 21. Haussmann & Dunn                                     | 1890–1899?            | 1                             | 1                                       |
| 22. Haussmann & Dunn                                     | 1894                  | 1                             | 0                                       |
| 23. Haussmann & Dunn                                     | 1907 (8th ed.)        | 3                             | 1                                       |
| 24. Haussman & Dunn Mfg. Co.                             | 1929 (19th ed.)       | 1                             | 1                                       |
| 25. Haver Glover Laboratories                            | 1924 (2nd ed.)        | 1                             | 1                                       |
| 26. Haver Glover Laboratories                            | 1928 (3rd ed.)        | 3                             | 3                                       |
| 27. Haver Glover Laboratories                            | 1932 (4th ed.)        | 1                             | 1                                       |
| 28. Haver Glover Laboratories                            | ? (5th ed.)           | 1                             | 1                                       |
| 29. Haver Glover Laboratories                            | 1939 (6th ed.)        | 1                             | 1                                       |
| 30. Haver Glover Laboratories                            | 1949/50 (9th ed.)     | 1                             | 1                                       |
| 31. Haver Glover Laboratories                            | ? (10th ed.)          | 1                             | 1                                       |
| 32. Haver Glover Laboratories                            | 1950–1959? (11th ed.) | 1                             | 0                                       |
| 33. Jensen Salsbery Laboratories                         | 1921 (4th ed.)        | 1                             | 1                                       |
| 34. Jensen Salsbery Laboratories                         | 1924                  | 1                             | 1                                       |
| 35. Jensen-Salsbery Laboratories                         | 1929 (5th ed.)        | 3                             | 1                                       |
| 36. Jensen-Salsbery Laboratories                         | 1938 (9th ed.)        | 1                             | 0                                       |
| 37. Jorgensen Laboratories                               | 1900s                 | 1                             | 1                                       |
| 38. Kansas City Vaccine Co.                              | 1955                  | 1                             | 1                                       |
| 39. F. A. Koch & Co.                                     | 1914 (9th ed.)        | 1                             | 1                                       |
| 40. Miltex Instrument Company                            | 2002                  | 1                             | 0                                       |
| 41. Omaha Vaccine Co.                                    | 1978                  | 1                             | 0                                       |

|               | <b>Name of company</b>                 | <b>Date</b>           | <b>No. of records located</b> | <b>No. held by veterinary libraries</b> |
|---------------|----------------------------------------|-----------------------|-------------------------------|-----------------------------------------|
| 42.           | George P. Pilling & Son                | 1903                  | 1                             | 0                                       |
| 43.           | Pitman-Moore                           | 1939                  | 1                             | 0                                       |
| 44.           | Pitman-Moore                           | 1943                  | 1                             | 0                                       |
| 45.           | John Reynders & Co.                    | 1881                  | 1                             | 0                                       |
| 46.           | John Reynders & Co.                    | 1883 (2nd ed.)        | 1                             | 0                                       |
| 47.           | John Reynders & Co.                    | 1889 (4th ed.)        | 1                             | 0                                       |
| 48.           | John Reynders & Co.                    | 1896 (8th ed.)        | 1                             | 0                                       |
| 49.           | Sharp & Smith                          | 1890–1909?            | 1                             | 1                                       |
| 50.           | Sharp & Smith                          | 1929 (20th ed.)       | 1                             | 0                                       |
| 51.           | Spectrum Surgical Instruments Corp.    | 1996                  | 1                             | 1                                       |
| 52.           | Spectrum Surgical Instruments Corp.    | 2000                  | 1                             | 1                                       |
| 53.           | Thorne Research                        | 2004 (4th ed.)        | 1                             | 1                                       |
| 54.           | Chas. Truax, Greene & Co.              | 1894                  | 2                             | 1                                       |
| 55.           | Truax, Greene & Co.                    | 1915 (17th ed.)       | 1                             | 0                                       |
| 56.           | J. H. Tuttle                           | 1885                  | 1                             | 0                                       |
| 57.           | Welch Allyn, Inc.                      | 1940–1947             | 1                             | 0                                       |
| 58.           | Western Ranch Supply Co.               | 1950                  | 1                             | 0                                       |
| 59.           | Winthrop Chemical Company              | 1940s                 | 1                             | 0                                       |
| 60.           | Max Wochner & Son                      | 1891                  | 1                             | 1                                       |
| 61.           | Max Wochner & Son                      | 1900–1920 (12th ed.)  | 1                             | 0                                       |
| 62.           | Max Wochner & Son                      | 1910–1919? (14th ed.) | 3                             | 2                                       |
| 63.           | Woodard, Animal Health Premix Division | 1990                  | 1                             | 0                                       |
| 64.           | Woodard, Animal Health Premix Division | 1991                  | 1                             | 0                                       |
| <b>Totals</b> |                                        | <b>64</b>             | <b>77</b>                     | <b>44</b>                               |
