# Supplementary material
Source: PubMed Central journal article supplement (PMC3016659)
Supplement: 10.3163.1536-5050.99.1.004.sg004.pdf [file 10.3163.1536-5050.99.1.004.sg004.pdf]

**The lost history of American veterinary medicine: the need for preservation**

**C. Trenton Boyd, MA, AHIP**

**Table 4**  
Library holdings of house organs from veterinary-related companies

|     | <b>Title</b>                                              | <b>Company</b>              | <b>No. of holding libraries</b> | <b>Complete set available</b> | <b>One or several libraries</b> |
|-----|-----------------------------------------------------------|-----------------------------|---------------------------------|-------------------------------|---------------------------------|
| 1.  | Allied Veterinarian                                       | Pitman Moore                | 22                              | Yes                           | 1                               |
| 2.  | American Veterinarian                                     | American Veterinary Supply  | 0                               | No                            | 0                               |
| 3.  | Animal Health Review                                      | Parke Davis                 | 1                               | Yes                           | 1                               |
| 4.  | Animal Health Solution                                    | Butler Animal Health Supply | 1                               | No                            | 0                               |
| 5.  | Animal Nutrition Series                                   | Kal Kan                     | 4                               | Yes                           | 1                               |
| 6.  | Animalis Familiaris (Eng. edition)                        | Master Foods/Waltham        | 2                               | No                            | 1                               |
| 7.  | Blue Book for the Veterinary Profession (English edition) | Hoechst Behringwerke        | 23                              | Yes                           | 1                               |
| 8.  | Blatchford's Chips                                        | Blatchford Calf Meal        | 0                               | No                            | 0                               |
| 9.  | Bovine Clinics                                            | Bristol Lab.                | 4                               | Yes                           | 1                               |
| 10. | Bovine Veterinary Forum                                   | Norden Lab.                 | 8                               | Yes                           | 1                               |
| 11. | Breeder Forum                                             | Kal Kan                     | 9                               | No                            | 0                               |
| 12. | Bulletin. Ralston Purina                                  | Ralston Purina              | 1                               | Yes                           | 1                               |
| 13. | Carnation Research Digest                                 | Friskies Pet Foods          | 14                              | Yes                           | 1                               |
| 14. | Cattle Specialist                                         | Dr. David Roberts           | 2                               | No                            | 0                               |
| 15. | Charles River Digest                                      | Charles River               | 15                              | Yes                           | 1                               |
| 16. | Charles River Technical Bulletin                          | Charles River               | 7                               | Yes                           | 1                               |
| 17. | Checker Service Bull.                                     | Purina Mills                | 1                               | No                            | 0                               |
| 18. | Checkerboard News                                         | Ralston Purina              | 1                               | No                            | 0                               |
| 19. | Checkerboard Service                                      | Ralston Purina              | 1                               | No                            | 0                               |
| 20. | Checkergraph                                              | Ralston Purina              | 0                               | No                            | 0                               |
| 21. | Corn States Needle                                        | Corn States Serum Co.       | 2                               | No                            | 0                               |
| 22. | Cyanamid International Veterinary Bulletin                | Cyanamid International      | 5                               | Yes                           | 1                               |
| 23. | Cyanamid International Veterinary News                    | Cyanamid International      | 2                               | No                            | 0                               |
| 24. | Dermatology Reports                                       | Squibb                      | 11                              | Yes                           | Several                         |
| 25. | Dr. Salsbury's Lab & Field Notes                          | Dr. Salsbury's Lab.         | 0                               | No                            | 0                               |
| 26. | Equine Medical Review                                     | Haver/Bayer                 | 11                              | Yes                           | 1                               |
| 27. | Equine Sportsmedicine                                     | Squibb                      | 9                               | Yes                           | 1                               |
| 28. | Feeder's Purinagraph                                      | Purina Mills                | 1                               | Yes                           | 1                               |
| 29. | Fort Dodge Biochemic Review                               | Fort Dodge Lab.             | 17                              | Yes                           | 1                               |
| 30. | Forum                                                     | Kal Kan                     | 12                              | Yes                           | 1                               |

|     | <b>Title</b>                                           | <b>Company</b>       | <b>No. of holding libraries</b> | <b>Complete set available</b> | <b>One or several libraries</b> |
|-----|--------------------------------------------------------|----------------------|---------------------------------|-------------------------------|---------------------------------|
| 31. | Friskies Pet Digest                                    | Carnation Co.        | 4                               | Yes                           | 1                               |
| 32. | Friskies Research Digest (1966)                        | Carnation Co.        | 15                              | Yes                           | 1                               |
| 33. | Friskies Research Digest (1987)                        | Carnation Co.        | 10                              | Yes                           | 1                               |
| 34. | Friskies Veterinary Journal                            | Friskies PetCare     | 5                               | Yes                           | 1                               |
| 35. | Haver-Glover Messenger                                 | Haver-Glover Lab.    | 9                               | Yes                           | 1                               |
| 36. | Haver-Glover Monthly Messenger                         | Haver-Glover Lab.    | 5                               | No                            | 0                               |
| 37. | Haver-Lockhart Messenger                               | Haver-Lockhart Lab.  | 6                               | Yes                           | 1                               |
| 38. | Helpful Hints for the Veterinarian                     | Abbott Alkaloidal    | 1                               | No                            | 0                               |
| 39. | Jen-Sal Abstracts...                                   | Jensen-Salsbery Lab  | 1                               | No                            | 0                               |
| 40. | Jen-Sal Journal                                        | Jensen-Salsbery Lab. | 15                              | No                            | 0                               |
| 41. | Jen-Sal Small Animal Topics                            | Jensen-Salsbery Lab. | 6                               | Yes                           | 1                               |
| 42. | Jen-Sal Therapy Bulletin                               | Jensen-Salsbery Lab. | 2                               | Yes                           | 1                               |
| 43. | Journal of Continuing Education in Veterinary Medicine | Squibb               | 0                               | No                            | 0                               |
| 44. | Kal Kan Forum (1982)                                   | Kal Kan              | 15                              | No                            | 0                               |
| 45. | Kal Kan Forum (1988)                                   | Kal Kan              | 13                              | Yes                           | 1                               |
| 46. | Kennel Doctor                                          | Foster & Smith       | 3                               | Yes                           | 1                               |
| 47. | Kennel Healthline                                      | Dog World            | 1                               | Yes                           | 1                               |
| 48. | Lab-Fax Veterinarian                                   | Whitmoyer Lab.       | 0                               | No                            | 0                               |
| 49. | Labchows Digest                                        | Ralston Purina       | 8                               | Yes                           | 1                               |
| 50. | Laboratory Animal Digest                               | Ralston Purina       | 26                              | Yes                           | 1                               |
| 51. | Larro Feeder                                           | Larro Feeds          | 0                               | No                            | 0                               |
| 52. | Livestock Prosperity                                   | Purina Mills         | 1                               | Yes                           | 1                               |
| 53. | Livestock Service Bull.                                | Ralston Purina       | 1                               | No                            | 0                               |
| 54. | Merchants Checkergraph                                 | Ralston Purina       | 1                               | No                            | 0                               |
| 55. | Messenger                                              | Haver-Lockhart       | 7                               | Yes                           | 1                               |
| 56. | Mulford Veterinary Bulletin                            | H. K. Mulford Co.    | 8                               | No                            | 0                               |
| 57. | Nestle Purina Square One                               | Nestle Purina        | 2                               | No                            | 0                               |
| 58. | Norden News                                            | Norden Lab.          | 26                              | No                            | 0                               |
| 59. | Notebook                                               | Ralston Purina       | 1                               | No                            | 0                               |
| 60. | Nutrena Nuggets                                        | Nutrenea Mills       | 0                               | No                            | 0                               |
| 61. | Nutrition News Bulletin                                | Ralston Purina       | 3                               | No                            | 0                               |
| 62. | Nutritional Aids                                       | Quaker Oats          | 1                               | Yes                           | 1                               |
| 63. | Nutritional Research Review                            | Hill's Pet Nutrition | 0                               | No                            | 0                               |
| 64. | Pedigree Digest                                        | Pedigree Petfoods    | 2                               | Yes                           | 1                               |
| 65. | Pedigree Forum                                         | Kal Kan              | 14                              | Yes                           | Several                         |
| 66. | Practicing Veterinarian                                | Pitman Moore         | 47                              | Yes                           | 1                               |
| 67. | Practitioners Bulletin                                 | DeVine Lab.          | 0                               | No                            | 0                               |
| 68. | Prescription Bulletin Service (Dog Diet)               | Hill Packing Co.     | 1                               | Yes                           | 1                               |
| 69. | Prescription Diets                                     | Hill Packing Co.     | 1                               | No                            | 0                               |

|      | <b>Title</b>                        | <b>Company</b>        | <b>No. of<br/>holding<br/>libraries</b> | <b>Complete set<br/>available</b> | <b>One or<br/>several<br/>libraries</b> |
|------|-------------------------------------|-----------------------|-----------------------------------------|-----------------------------------|-----------------------------------------|
| 70.  | Prescription Diets Bulletin         | Hill Packing Co.      | 1                                       | No                                | 0                                       |
| 71.  | Pro Veterinaro (English<br>edition) | Upjohn                | 1                                       | No                                | 0                                       |
| 72.  | Puppy Dog Tales                     | Warner Dog Food       | 0                                       | No                                | 0                                       |
| 73.  | Purina Dairy Service<br>Bulletin    | Ralston Purina        | 1                                       | No                                | 0                                       |
| 74.  | Purina Hog Service<br>Bulletin      | Ralston Purina        | 1                                       | No                                | 0                                       |
| 75.  | Purina Kennel News                  | Ralston Purina        | 3                                       | No                                | 0                                       |
| 76.  | Purina Livestock<br>Prosperity      | Purina Mills          | 1                                       | Yes                               | 1                                       |
| 77.  | Purina Poultry Service<br>Bulletin  | Ralston Purina        | 1                                       | No                                | 0                                       |
| 78.  | Purina Research Report              | Ralston Purina        | 1                                       | No                                | 0                                       |
| 79.  | Purina Research Service<br>Bulletin | Ralston Purina        | 1                                       | No                                | 0                                       |
| 80.  | Purina Research &<br>Service Digest | Ralston Purina        | 2                                       | Yes                               | 1                                       |
| 81.  | Purina Safety Guard                 | Ralston Purina        | 0                                       | No                                | 0                                       |
| 82.  | Purina Square One                   | Ralston Purina        | 2                                       | No                                | 0                                       |
| 83.  | Purina Turkey Service<br>Bulletin   | Ralston Purina        | 1                                       | No                                | 0                                       |
| 84.  | Schering Veterinary Digest          | Schering Corp.        | 1                                       | No                                | 0                                       |
| 85.  | SureHealth                          | Merial                | 0                                       | No                                | 0                                       |
| 86.  | Swine Consultant                    | Norden                | 2                                       | No                                | 0                                       |
| 87.  | TechAmerica Talks                   | TechAmerica Group     | 0                                       | No                                | 0                                       |
| 88.  | Today's Breeder                     | Ralston Purina        | 6                                       | Yes                               | Several                                 |
| 89.  | Topics in Veterinary<br>Medicine    | SmithKline Beecham    | 24                                      | Yes                               | 1                                       |
| 90.  | Veterinarian                        | Pitman-Moore          | 2                                       | Yes                               | 1                                       |
| 91.  | Veterinary Advocate                 | Pitman-Moore          | 1                                       | Yes                               | 1                                       |
| 92.  | Veterinary Bulletin                 | American Cyanamid     | 5                                       | Yes                               | 1                                       |
| 93.  | Veterinary Bulletin Lederle         | American Cyanamid     | 7                                       | Yes                               | Several                                 |
| 94.  | Veterinary Clinical Gems            | Armour Pharmaceutical | 1                                       | No                                | 0                                       |
| 95.  | Veterinary Digest                   | Squibb                | 12                                      | Yes                               | 1                                       |
| 96.  | Veterinary Dispatch                 | Schering              | 2                                       | No                                | 0                                       |
| 97.  | Veterinary Excerpts                 | Winthrop              | 15                                      | Yes                               | Several                                 |
| 98.  | Veterinary Focus                    | DermVet               | 12                                      | Yes                               | 1                                       |
| 99.  | Veterinary Focus                    | Royal Canin           | 17                                      | Yes                               | 1                                       |
| 100. | Veterinary International            | Nestle Products       | 13                                      | Yes                               | Several                                 |
| 101. | Veterinary Lederle Bulletin         | American Cyanamid     | 5                                       | Yes                               | 1                                       |
| 102. | Veterinary Notes                    | Parke, Davis          | 0                                       | No                                | 0                                       |
| 103. | Veterinary Previews                 | Ralston Purina        | 9                                       | Yes                               | 1                                       |
| 104. | Veterinary Review                   | Grand Lab.            | 6                                       | Yes                               | 1                                       |
| 105. | Veterinary Scope (1953)             | Upjohn                | 29                                      | Yes                               | 1                                       |
| 106. | Veterinary Scope (1982)             | Upjohn                | 14                                      | Yes                               | 1                                       |
| 107. | Veterinary Scope/Beef               | Upjohn                | 2                                       | No                                | 0                                       |
| 108. | Veterinary Scope/Dairy              | Upjohn                | 2                                       | No                                | 0                                       |
| 109. | Veterinary Scope/Small              | Upjohn                | 2                                       | No                                | 0                                       |

|      | <b>Title</b>                | <b>Company</b>  | <b>No. of holding libraries</b> | <b>Complete set available</b> | <b>One or several libraries</b> |
|------|-----------------------------|-----------------|---------------------------------|-------------------------------|---------------------------------|
|      | Animal                      |                 |                                 |                               |                                 |
| 110. | Veterinary Scope/Swine      | Upjohn          | 2                               | No                            | 0                               |
| 111. | Veterinary Snapshots        | Abbott Lab.     | 0                               | No                            | 0                               |
| 112. | Waltham Focus               | Waltham         | 26                              | Yes                           | 1                               |
| 113. | Waltham International Focus | Waltham         | 22                              | Yes                           | 1                               |
| 114. | Wilkie Veterinary Journal   | Wilkie Drug Co. | 0                               | No                            | 0                               |
